# Supplementary material
Source: PubMed Central journal article supplement (PMC4505654)
Supplement: JVI.00741-15_zjv999090608so1.pdf [file JVI.00741-15_zjv999090608so1.pdf]

**S-Table 1. Cellular proteins that co-immunoprecipitated with MEF-gB**

| RefSeq accession number | Definition (gene symbol)                 | Score <sup>a</sup> | Peptide sequence          |    |              |
|-------------------------|------------------------------------------|--------------------|---------------------------|----|--------------|
| NP_005338.1             | 78 kDa glucose-regulated protein (HSPA5) | 38                 | VLESDLK                   |    |              |
|                         |                                          | 53                 | ETAEAYLGK                 |    |              |
|                         |                                          | 35                 | LTPEEIER                  |    |              |
|                         |                                          | 46                 | VLESDLKK                  |    |              |
|                         |                                          | 55                 | ITITNDQNR                 |    |              |
|                         |                                          | 58                 | VYEGERPLT                 |    |              |
|                         |                                          | 75                 | DAGTIAGLNVMR              |    |              |
|                         |                                          | 79                 | FEELNMDLFR                |    |              |
|                         |                                          | 50                 | NELESYAYSLK               |    |              |
|                         |                                          | 46                 | ELEEIVQPIISK              |    |              |
|                         |                                          | 64                 | TWNDPSVQQDIK              |    |              |
|                         |                                          | 62                 | SDIDEIVLVGGSTR            |    |              |
|                         |                                          | 52                 | AKFEELNMDLFR              |    |              |
|                         |                                          | 65                 | TFAPEEISAMVLTK            |    |              |
|                         |                                          | 67                 | ITPSYVAFTPEGER            |    |              |
|                         |                                          | 39                 | KSDIDEIVLVGGSTR           |    |              |
|                         |                                          | 44                 | TKPYIQVDIGGGQTK           |    |              |
|                         |                                          | 87                 | IINEPTAAAIAAYGLDK         |    |              |
|                         |                                          | 78                 | NQLTSNPENTVFDAK           |    |              |
|                         |                                          | 87                 | IINEPTAAAIAAYGLDKR        |    |              |
|                         |                                          | 81                 | SQIFSTASDNQPTVTIK         |    |              |
|                         |                                          | 78                 | VTHAVVTVPAYFNDAQR         |    |              |
|                         |                                          | 62                 | DNHLLGTFDLTGIPPAPR        |    |              |
|                         |                                          | 65                 | IEWLESHQDADIEDFK          |    |              |
|                         |                                          | 79                 | IEIESFYEGEDFSETLTR        |    |              |
|                         |                                          | NP_821133.1        | tubulin beta chain (TUBB) | 56 | YLTVAAVFR    |
|                         |                                          |                    |                           | 45 | LAVNMVPFPR   |
|                         |                                          |                    |                           | 66 | ISEQFTAMFR   |
|                         |                                          |                    |                           | 63 | ISVYYNEATGGK |
|                         |                                          |                    |                           | 88 | IMNTFSVVPSPK |
| 75                      | EVDEQMLNVQNK                             |                    |                           |    |              |
| 78                      | AILVDLEPGTMDSVR                          |                    |                           |    |              |
| 54                      | LHFFMPGFAPLTSR                           |                    |                           |    |              |
| 78                      | ALTVPELTQQVFDAK                          |                    |                           |    |              |
| 46                      | NSSYFVEWIPNNVK                           |                    |                           |    |              |
| 94                      | GHYTEGAELVDSVLDVVR                       |                    |                           |    |              |
| 54                      | SGPFGQIFRPDNFVFGQSGAGNNW                 |                    |                           |    |              |
| NP_006079.1             | tubulin beta-2C chain (TUBB4B)           |                    | AK                        |    |              |
|                         |                                          | 63                 | INVYYNEATGGK              |    |              |
|                         |                                          | 61                 | AVLVDLEPGTMDSVR           |    |              |
| NP_001737.1             | calnexin precursor (CANX)                | 55                 | ALTVPELTQQMFDAK           |    |              |
|                         |                                          | 40                 | TGIYEEK                   |    |              |
|                         |                                          | 42                 | EIEDPEDR                  |    |              |
|                         |                                          | 56                 | GTLSGWILSK                |    |              |
|                         |                                          | 42                 | AEDEILNR                  |    |              |
|                         |                                          | 49                 | KPEDWDERPK                |    |              |
|                         |                                          | 105                | IVDDWANDGWGLK             |    |              |
|                         |                                          | 74                 | IPNPdffedLEPFR            |    |              |
|                         |                                          | 99                 | APVPTGEVYFADSFDR          |    |              |

|                |                                                                                       |    |                       |
|----------------|---------------------------------------------------------------------------------------|----|-----------------------|
| NP_116093.1    | tubulin alpha-1C chain (TUBA1C)                                                       | 74 | IPDPEAVKPDDWDEDAPAK   |
|                |                                                                                       | 56 | EDMAALEK              |
|                |                                                                                       | 53 | EIIDLVLR              |
|                |                                                                                       | 47 | QLFHPEQLITGK          |
|                |                                                                                       | 40 | LISQIVSSITASLR        |
|                |                                                                                       | 96 | AVFVDLEPTVIDEVR       |
|                |                                                                                       | 35 | NLDIERPTYTNLNR        |
|                |                                                                                       | 43 | IHFPLATYAPVISA EK     |
|                |                                                                                       | 82 | TIGGGDDSFNTFFSETGAGK  |
|                |                                                                                       | 92 | AFVHWYV GEGMEEGEFSEAR |
| NP_006588.1    | heat shock cognate 71 kDa protein (HSPA8)                                             | 36 | EIAEAYLGK             |
|                |                                                                                       | 55 | DAGTIAGLNVL R         |
|                |                                                                                       | 65 | FEELNADLFR            |
|                |                                                                                       | 49 | TTPSYVAFTDTER         |
|                |                                                                                       | 35 | NQTAEKEEFEHQ QK       |
| NP_001091.1    | actin, alpha skeletal muscle (ACTA1)                                                  | 44 | AGFAGDDAPR            |
|                |                                                                                       | 57 | HQGVMVGMGQK           |
|                |                                                                                       | 55 | DSYVGDEAQSK           |
| NP_002256.2    | importin subunit beta-1 (KPNB1)                                                       | 61 | VLANPGNSQVAR          |
|                |                                                                                       | 56 | LAATNALLNSLEFTK       |
| NP_001012680.1 | 4F2 cell-surface antigen heavy chain (SLC3A2) <sup>b</sup>                            | 92 | VAEDEAEAAAAAK         |
| NP_001203.1    | complement component 1 Q subcomponent-binding protein,mitochondrial precursor (C1QBP) | 57 | AFVDFLSDEIK           |
|                |                                                                                       | 62 | AFVDFLSDEIKEER        |
| NP_444513.1    | dermcidin preproprotein (DCD)                                                         | 69 | DAVEDLESVGK           |
| NP_003477.4    | large neutral amino acids transporter small subunit 1 (SLC7A5)                        | 41 | ALAAPAAEEK            |
|                |                                                                                       | 43 | SADGSAPAGEGEGVTLQR    |
| NP_005505.2    | major histocompatibility complex, class I, B precursor (HLA-B)                        | 54 | FSDAASPR              |
| NP_004198.1    | monocarboxylate transporter 4 (SLC16A3)                                               | 51 | LHKPPADSGVDLR         |
| NP_008893.1    | zinc finger protein 182 (ZNF182)                                                      | 39 | QHQQDDQDK             |
| NP_694858.1    | transportin-1 isoform 2 (TNPO1)                                                       | 37 | ESQSPDTTIQR           |
| NP_849143.1    | dynein assembly factor with WDR repeat domains 1 (DAW1)                               | 36 | HGELKTK               |

<sup>a</sup> The score is  $-10 \cdot \log(P)$ , where P is the probability that the observed match was a random event. A score > 34 indicated identity or extensive homology ( $p < 0.05$ ).

<sup>b</sup> 4F2 cell-surface antigen heavy chain (SLC3A2) is also designated CD98hc.

**S-Table 2. HSV-1 proteins that co-immunoprecipitated with MEF-gB**

| Definition (gene symbol) | Score <sup>a</sup> | Peptide sequence                |
|--------------------------|--------------------|---------------------------------|
| UL27 (gB)                | 37                 | ENIAPYK                         |
|                          | 62                 | GTSALLSAK                       |
|                          | 49                 | VTDMVMR                         |
|                          | 37                 | NQLHDLR                         |
|                          | 43                 | SEYGGSFR                        |
|                          | 45                 | ALYPLTK                         |
|                          | 56                 | QVDGFYAR                        |
|                          | 54                 | HVNDMLGR                        |
|                          | 35                 | GWHTTDLK                        |
|                          | 59                 | KGTSALLSAK                      |
|                          | 66                 | TTSSIEFAR                       |
|                          | 57                 | NTNYTQVPNK                      |
|                          | 66                 | YMALVSAMER                      |
|                          | 66                 | NNLETTAFHR                      |
|                          | 46                 | WQEVDEMLR                       |
|                          | 56                 | APVPFEEVIDK                     |
|                          | 61                 | LNPNAIASATVGR                   |
|                          | 62                 | LQFTYNHIQR                      |
|                          | 56                 | RNTNYTQVPNK                     |
|                          | 83                 | YSQFMGIFEDR                     |
|                          | 71                 | DSGLLDYTEVQR                    |
|                          | 87                 | KLNPNAIASATVGR                  |
|                          | 70                 | DVTVSQVWFGHR                    |
|                          | 62                 | EGSHEHTSYAADR                   |
|                          | 63                 | APVPFEEVIDKINAK                 |
|                          | 64                 | DDHETDMELKPANAATR               |
|                          | 90                 | KPPNPTPPPPGASANASVER            |
|                          | 114                | NPTNPDASGEGEGGDFDEAK            |
|                          | 90                 | YEDQGPLVEGQLGENNELR             |
|                          | 44                 | RNTNYTQVPNKDGADEDDL             |
|                          | 83                 | ELKNPTNPDASGEGEGGDFDEAK         |
|                          | 81                 | YFTFGGGYVYFEEYAYSHQLSR          |
|                          | 43                 | NNLETTAFHRDDHETDMELKPAN<br>AATR |
|                          | UL22 (gH)          | 56                              |
| 42                       |                    | GDNVATASHPSGPR                  |
| 40                       |                    | GLLYNPVASVLLR                   |

<sup>a</sup> The score is  $-10 \cdot \log(P)$ , where P is the probability that the observed match was a random event. A score > 34 indicated identity or extensive homology ( $p < 0.05$ ).
